# Supplementary material for: Oxidation Prevents HMGB1 Inhibition on PDGF-Induced Differentiation of Multipotent Vascular Stem Cells to Smooth Muscle Cells: A Possible Mechanism Linking Oxidative Stress to Atherosclerosis
Source: Hindawi journal article supplement (doi:10.1155/2018/4019814), 2018-01-01
Supplement: f1 [file 4019814.f1.pdf]

## Supplementary Material

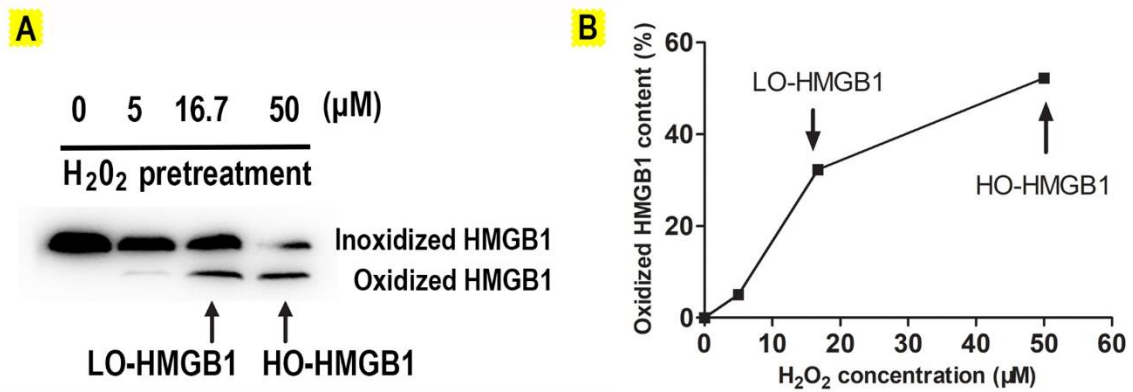

Figure S1: Determination of oxidized HMGB1 content in the mixtures of inoxidized and oxidized HMGB1. Oxidized HMGB1 was separated on SDS-PAGE gel and detected by Western blot with HMGB1 antibody (A). The mixtures with approximately 30% and 50% oxidized HMGB1 were labeled as LO-HMGB1 (low-level oxidized HMGB1) and HO-HMGB1 (high-level oxidized HMGB1), respectively (B).

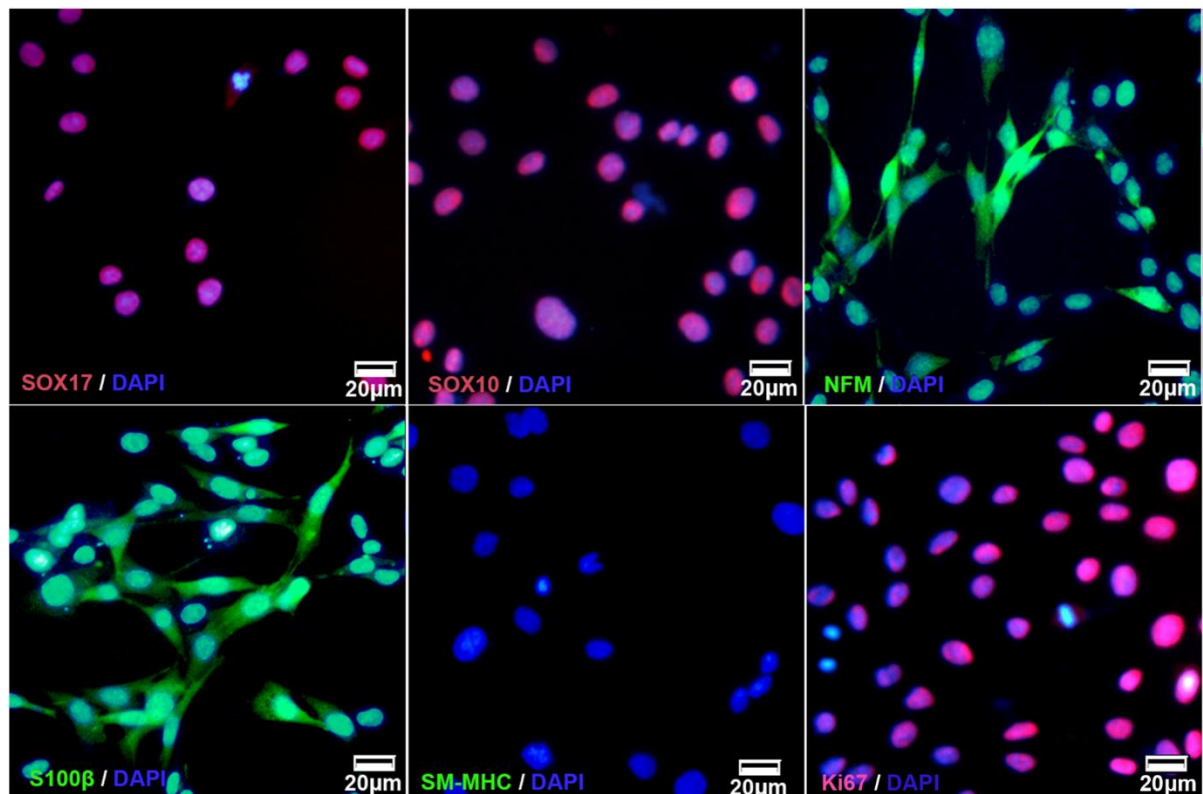

Figure S2: Immunofluorescent assay for MVSC markers on isolated cells. The cells were positive for Sox17, Sox 10, neural filament-medium polypeptide (NFM) and S100 $\beta$  while lacking smooth muscle myosine heavy chain (SM-MHC). Ki67 expression indicated that the cells were highly

proliferative.
